# Supplementary material for: Colon Epithelial MicroRNA Network in Fatty Liver
Source: Hindawi journal article supplement (doi:10.1155/2018/8246103), 2018-09-24
Supplement: f1 [file 8246103.f1.pdf]

## SUPPLEMENTARY MATERIALS

Supplementary Table 1: Two hundred and eighty-eight miRs are altered in their expression levels by  $\geq 2.0$ -fold in CRL-1790 cells expressing any of the MetS-FL miR (miR-142-3p, miR-18b, and miR-890) mimic compared to cells expressing control cel-miR mimic.

| <b>miR Name</b>  | <b>miR-142-3p<br/>vs. cel-miR</b> | <b>P value of:<br/>miR-142-3p<br/>vs. cel-miR</b> | <b>miR-18b<br/>vs. cel-miR</b> | <b>P value of:<br/>miR-18b vs.<br/>cel-miR</b> | <b>miR-890<br/>vs. cel-miR</b> | <b>P value of:<br/>miR-890 vs.<br/>cel-miR</b> |
|------------------|-----------------------------------|---------------------------------------------------|--------------------------------|------------------------------------------------|--------------------------------|------------------------------------------------|
| hsa-let-7c-5p    | 2.19                              | 0.03606                                           | 1.02                           | 0.957506                                       | -1.17                          | 0.666809                                       |
| hsa-miR-1-3p     | 1.09                              | 0.802673                                          | 2.16                           | 0.314305                                       | 1.37                           | 0.341617                                       |
| hsa-miR-101-3p   | 1.84                              | 0.084051                                          | -2.41                          | 0.375395                                       | 1.05                           | 0.837828                                       |
| hsa-miR-105-5p   | -2.14                             | 0.175302                                          | 1.17                           | 0.773273                                       | -1.58                          | 0.351355                                       |
| hsa-miR-10b-5p   | 3.61                              | 0.050967                                          | 3.26                           | 0.073587                                       | 4.06                           | 0.042708                                       |
| hsa-miR-1178-3p  | -1.65                             | 0.457899                                          | -1.25                          | 0.817197                                       | -2.23                          | 0.241221                                       |
| hsa-miR-1185-5p  | 2.27                              | 0.061002                                          | 3.7                            | 0.014811                                       | 1.62                           | 0.108062                                       |
| hsa-miR-1193     | 22.65                             | 0.023702                                          | 2.34                           | 0.321815                                       | 1.28                           | 0.701636                                       |
| hsa-miR-1200     | -1.23                             | 0.800336                                          | 4.27                           | 0.064434                                       | -1.08                          | 0.874252                                       |
| hsa-miR-1202     | 2.1                               | 0.26361                                           | 1.24                           | 0.682648                                       | 1.02                           | 0.965436                                       |
| hsa-miR-1203     | 2.07                              | 0.227216                                          | 1.96                           | 0.277651                                       | 1.7                            | 0.364619                                       |
| hsa-miR-1204     | 1.11                              | 0.856621                                          | 1.38                           | 0.535461                                       | 2.41                           | 0.138737                                       |
| hsa-miR-1224-3p  | -1.97                             | 0.278859                                          | 2.66                           | 0.158544                                       | -1.16                          | 0.805958                                       |
| hsa-miR-1234-3p  | 1.9                               | 0.082749                                          | 2.47                           | 0.03302                                        | 1.28                           | 0.420733                                       |
| hsa-miR-1236-3p  | 1.22                              | 0.789551                                          | 3.63                           | 0.123661                                       | 1.74                           | 0.433375                                       |
| hsa-miR-1245a    | 1.13                              | 0.886945                                          | 2.66                           | 0.320127                                       | 1.42                           | 0.69794                                        |
| hsa-miR-1245b-3p | 1.54                              | 0.608792                                          | 2.05                           | 0.137482                                       | 2.62                           | 0.051956                                       |
| hsa-miR-1246     | -2.14                             | 0.300002                                          | 1.1                            | 0.90355                                        | -1.27                          | 0.752287                                       |
| hsa-miR-1249-3p  | -1.51                             | 0.250381                                          | 1.99                           | 0.037103                                       | -1.21                          | 0.68247                                        |
| hsa-miR-1250-5p  | 1.39                              | 0.571302                                          | -1                             | 0.994735                                       | 2.63                           | 0.339097                                       |
| hsa-miR-1254     | -3.8                              | 0.034118                                          | -2.55                          | 0.090602                                       | -1.96                          | 0.342467                                       |
| hsa-miR-125a-3p  | 4.61                              | 0.01646                                           | -1.15                          | 0.766352                                       | -1.05                          | 0.902663                                       |
| hsa-miR-1262     | -2.23                             | 0.145918                                          | 1.06                           | 0.91548                                        | -1.43                          | 0.467416                                       |
| hsa-miR-1268b    | -1.97                             | 0.362082                                          | 1.41                           | 0.337539                                       | -1.77                          | 0.222333                                       |
| hsa-miR-1269b    | 1.7                               | 0.560032                                          | 3.63                           | 0.072062                                       | 3.76                           | 0.009439                                       |
| hsa-miR-127-5p   | -2.08                             | 0.310629                                          | 1.14                           | 0.784063                                       | -1.35                          | 0.534999                                       |
| hsa-miR-1275     | 1.25                              | 0.777891                                          | 3.63                           | 0.038421                                       | 1.12                           | 0.803694                                       |
| hsa-miR-1276     | 1.47                              | 0.317249                                          | -1.01                          | 0.984591                                       | 5.14                           | 0.004201                                       |
| hsa-miR-1277-3p  | 1.87                              | 0.343163                                          | 2.35                           | 0.191317                                       | 1.1                            | 0.869095                                       |
| hsa-miR-1278     | -1.13                             | 0.855618                                          | 1.44                           | 0.620098                                       | -2.6                           | 0.201917                                       |
| hsa-miR-128-1-5p | 1.35                              | 0.572872                                          | 1.33                           | 0.635153                                       | 2.05                           | 0.188209                                       |
| hsa-miR-128-3p   | -3.04                             | 0.33573                                           | -1.81                          | 0.605729                                       | 4.05                           | 0.357891                                       |
| hsa-miR-1281     | 1.8                               | 0.299035                                          | 4.44                           | 0.100427                                       | 2.75                           | 0.250801                                       |
| hsa-miR-1283     | -3.6                              | 0.497916                                          | -1.03                          | 0.990534                                       | -3.9                           | 0.473793                                       |

|                                |         |          |         |          |       |          |
|--------------------------------|---------|----------|---------|----------|-------|----------|
| hsa-miR-1285-3p                | -1.3    | 0.751771 | 1.73    | 0.418979 | 2.45  | 0.08705  |
| hsa-miR-1288-3p                | 1.38    | 0.707768 | 1.48    | 0.473416 | 2.96  | 0.030991 |
| hsa-miR-1293                   | 1.43    | 0.462511 | -2.88   | 0.202524 | -2.12 | 0.206983 |
| hsa-miR-1296-5p                | -1.07   | 0.923674 | 2.01    | 0.474003 | -1.08 | 0.910611 |
| hsa-miR-1297                   | -1.28   | 0.812216 | -2.48   | 0.407822 | -1.62 | 0.735169 |
| hsa-miR-1298-5p                | 1.22    | 0.698921 | 2.07    | 0.207884 | 1.29  | 0.279199 |
| hsa-miR-1301-3p                | 2.14    | 0.36156  | 2.83    | 0.318387 | 3     | 0.101324 |
| hsa-miR-1302                   | -2.38   | 0.351722 | -1.02   | 0.943719 | -1.15 | 0.593141 |
| hsa-miR-1303                   | 1.52    | 0.480424 | 1.48    | 0.415226 | 5.06  | 0.087203 |
| hsa-miR-1304-5p                | 5.6     | 0.010992 | -2.3    | 0.257813 | -1.22 | 0.549384 |
| hsa-miR-132-3p                 | 3.14    | 0.09392  | -1.01   | 0.98626  | -1.2  | 0.764064 |
| hsa-miR-133b                   | -1.98   | 0.278937 | -1      | 0.999387 | 1.17  | 0.747523 |
| hsa-miR-134-5p+hsa-miR-6728-5p | -2.16   | 0.106277 | -1.17   | 0.603536 | -1.78 | 0.013976 |
| hsa-miR-137                    | -1.6    | 0.397641 | 2.13    | 0.102161 | -1.36 | 0.658952 |
| hsa-miR-142-3p                 | 8821.28 | 1.41E-05 | 2.38    | 0.083829 | -1.31 | 0.414854 |
| hsa-miR-142-5p                 | -2.92   | 0.193261 | -1.41   | 0.48133  | 1.09  | 0.77702  |
| hsa-miR-1469                   | 1.68    | 0.432735 | 1.42    | 0.634753 | 6.16  | 0.013479 |
| hsa-miR-146b-3p                | 2.88    | 0.147035 | -1.43   | 0.697336 | -1.19 | 0.651497 |
| hsa-miR-147a                   | 1.28    | 0.807198 | 2.04    | 0.392805 | 1.19  | 0.831389 |
| hsa-miR-147b                   | -1.12   | 0.669977 | 2.04    | 0.154425 | -1.13 | 0.629213 |
| hsa-miR-150-5p                 | -1.07   | 0.935937 | 1.5     | 0.716819 | 2.5   | 0.261464 |
| hsa-miR-152-5p                 | -1.5    | 0.55627  | 1.56    | 0.543005 | 2.12  | 0.027082 |
| hsa-miR-1537-3p                | 1.35    | 0.470971 | 1.1     | 0.852111 | -2.36 | 0.093229 |
| hsa-miR-155-5p                 | 1.11    | 0.834609 | 1.35    | 0.687076 | 2.36  | 0.410397 |
| hsa-miR-181b-2-3p              | 2.1     | 0.372367 | 1.5     | 0.604057 | 1.64  | 0.528189 |
| hsa-miR-181d-3p                | 1.59    | 0.498755 | 2.08    | 0.430112 | 1.39  | 0.48011  |
| hsa-miR-182-3p                 | 1.18    | 0.796372 | 2.51    | 0.232503 | -1.21 | 0.80764  |
| hsa-miR-184                    | -1.82   | 0.459115 | -1.04   | 0.931146 | 2.62  | 0.458814 |
| hsa-miR-187-3p                 | 1.13    | 0.77966  | 2.95    | 0.05577  | 1.11  | 0.898863 |
| hsa-miR-188-3p                 | -1.32   | 0.636893 | 8.62    | 0.026798 | 1.26  | 0.637197 |
| hsa-miR-18a-5p                 | -1.12   | 0.762193 | 18.82   | 0.094492 | -1.14 | 0.728732 |
| hsa-miR-18b-5p                 | -2.81   | 0.624342 | 2088.21 | 0.045375 | -3.69 | 0.532792 |
| hsa-miR-1908-3p                | 1.79    | 0.432721 | 1.51    | 0.706337 | 7.25  | 0.032135 |
| hsa-miR-1909-3p                | -1.66   | 0.406892 | 1.12    | 0.893527 | -2.13 | 0.206412 |
| hsa-miR-190a-3p                | 2.03    | 0.396382 | 2.16    | 0.388796 | 1.99  | 0.426103 |
| hsa-miR-190b                   | 2.59    | 0.149323 | 4.47    | 0.047128 | 1.81  | 0.409188 |
| hsa-miR-1915-3p                | 1.08    | 0.786043 | 1.46    | 0.276024 | -2.18 | 0.298938 |
| hsa-miR-193a-3p                | -1.65   | 0.178676 | -1.34   | 0.610954 | -2.77 | 0.223047 |
| hsa-miR-194-5p                 | 1.38    | 0.468615 | 2.05    | 0.038472 | 36.82 | 0.001269 |
| hsa-miR-195-5p                 | 1.51    | 0.631861 | 1.09    | 0.915847 | 2.17  | 0.382363 |
| hsa-miR-196a-3p                | 1.52    | 0.650474 | 1.98    | 0.612906 | 1.64  | 0.57162  |
| hsa-miR-1973                   | -1.34   | 0.277637 | -1.01   | 0.985636 | -2.6  | 0.146431 |

|                   |       |          |       |          |       |          |
|-------------------|-------|----------|-------|----------|-------|----------|
| hsa-miR-1976      | 1.43  | 0.554708 | 3.59  | 0.081194 | 1.73  | 0.37972  |
| hsa-miR-200b-3p   | -1.07 | 0.773546 | 8.53  | 0.002443 | -1.3  | 0.375684 |
| hsa-miR-202-3p    | -1.34 | 0.670352 | -2.44 | 0.260239 | 2.34  | 0.201064 |
| hsa-miR-204-5p    | -1.78 | 0.435923 | -2.03 | 0.362011 | -1.8  | 0.171815 |
| hsa-miR-208a-3p   | -2.09 | 0.051457 | -1.21 | 0.620922 | -1.56 | 0.192948 |
| hsa-miR-208b-3p   | -2.26 | 0.299544 | 1.05  | 0.9236   | -2.6  | 0.093203 |
| hsa-miR-208b-5p   | 1.02  | 0.982457 | 1.6   | 0.448545 | 2.03  | 0.247614 |
| hsa-miR-21-5p     | 1.03  | 0.966862 | -1.02 | 0.976063 | 2.94  | 0.206103 |
| hsa-miR-2113      | -1.01 | 0.982946 | 6.18  | 0.000219 | 1.36  | 0.352738 |
| hsa-miR-217       | 4.24  | 0.173285 | -1.14 | 0.864819 | -1.9  | 0.480815 |
| hsa-miR-218-5p    | 1.24  | 0.556827 | 1.56  | 0.300269 | 15.54 | 0.002212 |
| hsa-miR-219a-1-3p | 1.2   | 0.738957 | 1.41  | 0.302833 | 2.88  | 0.027576 |
| hsa-miR-223-3p    | 2.9   | 0.057042 | 4.02  | 0.026566 | 2.03  | 0.17953  |
| hsa-miR-224-5p    | 1.13  | 0.885581 | 2.04  | 0.350934 | 1.2   | 0.790719 |
| hsa-miR-296-3p    | -2.55 | 0.065092 | -1.59 | 0.644263 | -1.43 | 0.423712 |
| hsa-miR-298       | 2.66  | 0.283879 | 3.15  | 0.070277 | -1.15 | 0.776573 |
| hsa-miR-300       | 1.45  | 0.130441 | 1.24  | 0.478924 | 8.62  | 0.183916 |
| hsa-miR-301a-5p   | 2.19  | 0.082789 | 1.72  | 0.176924 | 2     | 0.13704  |
| hsa-miR-301b-3p   | 1.05  | 0.927397 | 1.95  | 0.184928 | -1.15 | 0.772476 |
| hsa-miR-301b-5p   | -1.42 | 0.606466 | 1.63  | 0.117482 | -2.51 | 0.086843 |
| hsa-miR-302b-3p   | -1.64 | 0.684474 | -2.61 | 0.406858 | -1.19 | 0.889393 |
| hsa-miR-30a-5p    | -1.95 | 0.017961 | -1.3  | 0.526955 | -1.98 | 0.007032 |
| hsa-miR-30e-3p    | 2.3   | 0.08615  | 2.33  | 0.108256 | 1.38  | 0.4159   |
| hsa-miR-31-5p     | 1.01  | 0.972319 | -3.02 | 0.061301 | 1.74  | 0.009215 |
| hsa-miR-3131      | 1.76  | 0.355629 | 1.42  | 0.62432  | 2.74  | 0.03507  |
| hsa-miR-3136-5p   | 1.34  | 0.773071 | 2.35  | 0.352065 | 2.09  | 0.38519  |
| hsa-miR-3140-3p   | -1.18 | 0.683728 | 1.45  | 0.598495 | 2.51  | 0.03865  |
| hsa-miR-3150b-3p  | -1.66 | 0.434147 | 1.62  | 0.383194 | 6.37  | 0.023245 |
| hsa-miR-3164      | -1.24 | 0.797679 | 1.13  | 0.884056 | 3.15  | 0.223938 |
| hsa-miR-3179      | 1.73  | 0.1914   | 3.31  | 0.128382 | 2.88  | 0.038979 |
| hsa-miR-3180-5p   | 2.4   | 0.202053 | 2.77  | 0.156818 | 1.92  | 0.314295 |
| hsa-miR-3185      | -1.34 | 0.719902 | 2.26  | 0.387619 | 1.15  | 0.866245 |
| hsa-miR-3202      | 2.14  | 0.094806 | 1.56  | 0.260562 | 9.09  | 0.007245 |
| hsa-miR-320b      | 1.22  | 0.726146 | 1.42  | 0.544768 | 2.52  | 0.050253 |
| hsa-miR-320d      | 1.43  | 0.44431  | 2.01  | 0.066472 | 1.96  | 0.216809 |
| hsa-miR-323a-5p   | -2.25 | 0.181724 | -1.4  | 0.474068 | -1.33 | 0.525161 |
| hsa-miR-323b-5p   | -2.09 | 0.441542 | -1.05 | 0.913903 | -1.65 | 0.509427 |
| hsa-miR-324-3p    | -1.98 | 0.43631  | -1.48 | 0.427099 | -1.32 | 0.514894 |
| hsa-miR-328-3p    | -1.05 | 0.903986 | 1.36  | 0.541172 | 4.27  | 0.010402 |
| hsa-miR-328-5p    | 1.39  | 0.68456  | 1.95  | 0.417771 | 1.07  | 0.944542 |
| hsa-miR-329-3p    | -1.7  | 0.518872 | -1.07 | 0.922975 | 12.01 | 0.121209 |
| hsa-miR-329-5p    | 2.39  | 0.130342 | 2.44  | 0.161713 | -1.54 | 0.378869 |
| hsa-miR-330-3p    | -1.45 | 0.60302  | 1.29  | 0.684974 | -2.44 | 0.041458 |

|                   |       |          |       |          |       |          |
|-------------------|-------|----------|-------|----------|-------|----------|
| hsa-miR-338-5p    | 1.05  | 0.920275 | 2.21  | 0.288661 | -1.26 | 0.754942 |
| hsa-miR-339-5p    | 2.35  | 0.203391 | 2.03  | 0.261774 | 1.3   | 0.663327 |
| hsa-miR-33a-5p    | -1.05 | 0.910402 | 2.05  | 0.182962 | 1.76  | 0.266073 |
| hsa-miR-342-5p    | 2.52  | 0.232602 | 3.12  | 0.2596   | 3.85  | 0.078097 |
| hsa-miR-346       | 1.65  | 0.32791  | 1.91  | 0.414193 | 2.64  | 0.12783  |
| hsa-miR-34b-3p    | 2.24  | 0.047764 | 1.17  | 0.834105 | -1.49 | 0.554591 |
| hsa-miR-34c-3p    | 1.41  | 0.252045 | 1     | 0.994946 | 7.31  | 0.035988 |
| hsa-miR-3613-3p   | -1.42 | 0.354328 | 2.2   | 0.142368 | -1.08 | 0.800846 |
| hsa-miR-3613-5p   | 1.04  | 0.945062 | 2.31  | 0.23923  | 1.3   | 0.636631 |
| hsa-miR-3614-3p   | 2.01  | 0.202605 | 2.35  | 0.095252 | 3.09  | 0.047567 |
| hsa-miR-3614-5p   | 1.73  | 0.343415 | 2.05  | 0.146506 | 1.31  | 0.477863 |
| hsa-miR-363-5p    | -1.39 | 0.29677  | -1.34 | 0.547448 | 4.41  | 0.009044 |
| hsa-miR-369-3p    | 1.35  | 0.570043 | 1.87  | 0.302834 | 2.08  | 0.230918 |
| hsa-miR-3690      | -1.9  | 0.114263 | 1.11  | 0.855424 | 3.04  | 0.011642 |
| hsa-miR-371b-5p   | 1.44  | 0.475679 | -1.13 | 0.852601 | 11.67 | 0.167168 |
| hsa-miR-374c-5p   | -3.13 | 0.016827 | -1.54 | 0.638553 | 1.49  | 0.34078  |
| hsa-miR-375       | -1.27 | 0.545392 | -2.13 | 0.144897 | -2.69 | 0.006912 |
| hsa-miR-376c-5p   | -1    | 0.99447  | 2.35  | 0.096929 | 1.13  | 0.795824 |
| hsa-miR-378c      | 2.22  | 0.020034 | 1.04  | 0.949078 | 2     | 0.159791 |
| hsa-miR-378e      | -1.01 | 0.996657 | 2.97  | 0.432893 | -3.18 | 0.384031 |
| hsa-miR-378g      | 1.55  | 0.575515 | 2.2   | 0.350385 | 1.43  | 0.636699 |
| hsa-miR-381-5p    | 1.3   | 0.561125 | 2.03  | 0.150576 | 1.64  | 0.344282 |
| hsa-miR-383-5p    | -1.47 | 0.322492 | -1.14 | 0.847552 | 2.67  | 0.06222  |
| hsa-miR-3918      | 1.45  | 0.539629 | 3.37  | 0.162988 | 3.24  | 0.137679 |
| hsa-miR-422a      | -2.49 | 0.578309 | 1.62  | 0.750017 | -3.81 | 0.390675 |
| hsa-miR-4284      | -2.53 | 0.223183 | -1.41 | 0.582378 | -2.07 | 0.420702 |
| hsa-miR-433-5p    | -1.03 | 0.954399 | -1.64 | 0.513297 | -3.3  | 0.131691 |
| hsa-miR-4435      | -1.55 | 0.047669 | 1.1   | 0.875234 | 27.06 | 0.000256 |
| hsa-miR-4448      | -1.61 | 0.207614 | 1.14  | 0.571033 | -2.05 | 0.281453 |
| hsa-miR-4458      | 1.86  | 0.402299 | 2.04  | 0.350334 | 6.77  | 0.057594 |
| hsa-miR-4461      | -1.21 | 0.787077 | -3.36 | 0.027881 | -1.51 | 0.303132 |
| hsa-miR-4485-3p   | 1.11  | 0.832034 | 2.48  | 0.028216 | 1.13  | 0.71071  |
| hsa-miR-4488      | 1.39  | 0.494631 | 1.92  | 0.068505 | -2.06 | 0.06003  |
| hsa-miR-449a      | -1.04 | 0.942072 | 2     | 0.276796 | 1.58  | 0.406085 |
| hsa-miR-450a-1-3p | 1.63  | 0.433431 | 2.85  | 0.235189 | 5.92  | 0.052849 |
| hsa-miR-4521      | 1.11  | 0.837257 | 1.27  | 0.677865 | 2.12  | 0.151011 |
| hsa-miR-4524a-5p  | 1.57  | 0.304275 | 4.3   | 0.029539 | 2.8   | 0.068808 |
| hsa-miR-4532      | -1.37 | 0.737126 | 1.06  | 0.909275 | -2.09 | 0.043211 |
| hsa-miR-4647      | 3.65  | 0.157733 | 2.82  | 0.21973  | 1.67  | 0.487817 |
| hsa-miR-4707-3p   | -1.09 | 0.880141 | -2.18 | 0.211744 | 1.63  | 0.378733 |
| hsa-miR-4792      | -1.34 | 0.685003 | 4.19  | 0.125165 | -1.42 | 0.624975 |
| hsa-miR-488-3p    | 2.11  | 0.131714 | -1.29 | 0.649305 | -2.86 | 0.02818  |
| hsa-miR-492       | 1.58  | 0.363834 | 1.48  | 0.300476 | 13.43 | 0.001828 |

|                                                                                               |       |          |       |          |        |          |
|-----------------------------------------------------------------------------------------------|-------|----------|-------|----------|--------|----------|
| hsa-miR-493-3p                                                                                | -1.15 | 0.709478 | 1.08  | 0.726797 | 2      | 0.029821 |
| hsa-miR-494-3p                                                                                | -5.95 | 0.505981 | -1.6  | 0.846789 | -1.31  | 0.921342 |
| hsa-miR-499a-3p                                                                               | -1.45 | 0.639346 | -1.75 | 0.475234 | -2.75  | 0.391274 |
| hsa-miR-5001-3p                                                                               | -1.2  | 0.760117 | -3.36 | 0.12597  | 1.68   | 0.513743 |
| hsa-miR-500a-5p+hsa-miR-501-5p                                                                | -1.51 | 0.280899 | -1.63 | 0.582323 | 3.02   | 0.047313 |
| hsa-miR-502-3p                                                                                | 1.83  | 0.211189 | 2.15  | 0.266776 | 1.17   | 0.72719  |
| hsa-miR-502-5p                                                                                | -1.01 | 0.990801 | 1.64  | 0.691368 | -3.29  | 0.371644 |
| hsa-miR-504-5p                                                                                | 1.03  | 0.936063 | 1.61  | 0.380067 | 2.74   | 0.059961 |
| hsa-miR-508-5p                                                                                | 3.62  | 0.011386 | 1.67  | 0.253217 | -1.01  | 0.957659 |
| hsa-miR-509-3-5p                                                                              | 1.11  | 0.842119 | 1.13  | 0.897864 | -2.04  | 0.254874 |
| hsa-miR-509-3p                                                                                | 2.11  | 0.106598 | -1.67 | 0.018751 | -1.04  | 0.930179 |
| hsa-miR-510-5p                                                                                | -1.46 | 0.563278 | 2.12  | 0.341401 | -1.19  | 0.766148 |
| hsa-miR-512-3p                                                                                | -2.83 | 0.146622 | -1.48 | 0.382972 | -1.78  | 0.435475 |
| hsa-miR-513a-3p                                                                               | -1.38 | 0.501786 | 2.37  | 0.269882 | 1.35   | 0.758341 |
| hsa-miR-514a-5p                                                                               | -2.44 | 0.328102 | 1.13  | 0.708341 | -1.73  | 0.205094 |
| hsa-miR-514b-3p                                                                               | -1.05 | 0.94539  | -1.84 | 0.342836 | -2.44  | 0.228189 |
| hsa-miR-514b-5p                                                                               | 1.41  | 0.547591 | 2.3   | 0.175212 | 1.33   | 0.571189 |
| hsa-miR-515-3p                                                                                | 1.18  | 0.833984 | 1.48  | 0.688159 | 3.2    | 0.216493 |
| hsa-miR-515-5p                                                                                | 1.33  | 0.644454 | -1.25 | 0.809262 | 3.31   | 0.072907 |
| hsa-miR-516a-5p                                                                               | -1.53 | 0.279043 | 1.69  | 0.318815 | 3.68   | 0.023906 |
| hsa-miR-516b-5p                                                                               | 1.55  | 0.487683 | 2.38  | 0.12735  | 103.84 | 0.096997 |
| hsa-miR-517c-3p+hsa-miR-519a-3p                                                               | -2.2  | 0.341909 | -1.28 | 0.51959  | -3.27  | 0.009775 |
| hsa-miR-518b                                                                                  | -1.32 | 0.619368 | -2.03 | 0.185541 | 3.04   | 0.074033 |
| hsa-miR-518d-3p                                                                               | -1.27 | 0.703509 | -1.14 | 0.87077  | 2      | 0.27715  |
| hsa-miR-518e-3p                                                                               | -1.32 | 0.535138 | 3.73  | 0.007129 | 1.17   | 0.6326   |
| hsa-miR-518f-3p                                                                               | 4.75  | 0.114935 | 1.16  | 0.31914  | -2.04  | 0.086277 |
| hsa-miR-5196-5p                                                                               | 4.71  | 0.001894 | 1.09  | 0.352609 | 1.73   | 0.027402 |
| hsa-miR-519b-5p+hsa-miR-519c-5p+hsa-miR-523-5p+hsa-miR-518e-5p+hsa-miR-522-5p+hsa-miR-519a-5p | -3.1  | 0.484799 | -2.27 | 0.458059 | -1.51  | 0.714341 |
| hsa-miR-519c-3p                                                                               | -1.21 | 0.644319 | 1.34  | 0.560773 | -2.36  | 0.096496 |
| hsa-miR-519d-3p                                                                               | -2.04 | 0.270705 | -1.54 | 0.575312 | -1.03  | 0.952728 |
| hsa-miR-519e-3p                                                                               | 1.14  | 0.847901 | -1.11 | 0.903553 | 3.17   | 0.142949 |
| hsa-miR-520a-5p                                                                               | 1.87  | 0.133262 | 2.47  | 0.029142 | 1.45   | 0.363363 |
| hsa-miR-520b                                                                                  | -1.96 | 0.339166 | -1.65 | 0.488682 | -1.94  | 0.345669 |
| hsa-miR-520c-3p                                                                               | -2.54 | 0.05015  | -1.29 | 0.526684 | -1.11  | 0.797792 |
| hsa-miR-520d-3p                                                                               | 1.34  | 0.717403 | -1.3  | 0.804824 | -1.98  | 0.440292 |
| hsa-miR-520f-3p                                                                               | -1.1  | 0.646804 | 1.52  | 0.36405  | 10.58  | 0.001285 |
| hsa-miR-520g-3p                                                                               | 1.53  | 0.440762 | 1.34  | 0.638352 | -1.16  | 0.772534 |

|                                                  |       |          |       |          |       |          |
|--------------------------------------------------|-------|----------|-------|----------|-------|----------|
| hsa-miR-520h                                     | 1.8   | 0.505084 | 2.79  | 0.295598 | -1.08 | 0.92867  |
| hsa-miR-521                                      | 3.18  | 0.117971 | 8.71  | 0.023211 | 1.26  | 0.666703 |
| hsa-miR-522-3p                                   | -1.95 | 0.44807  | -2.46 | 0.293702 | -1.75 | 0.577583 |
| hsa-miR-523-3p                                   | -2.31 | 0.121848 | -1.23 | 0.778888 | 1.09  | 0.848908 |
| hsa-miR-524-3p                                   | -2.17 | 0.225808 | -1.23 | 0.742307 | 1.82  | 0.089843 |
| hsa-miR-539-3p                                   | 1.2   | 0.789135 | 1.16  | 0.751325 | 3.1   | 0.119793 |
| hsa-miR-541-3p                                   | -1.18 | 0.622987 | -2.45 | 0.123958 | 1.29  | 0.485935 |
| hsa-miR-542-5p                                   | 2.22  | 0.019812 | 1.22  | 0.626754 | -1.55 | 0.228458 |
| hsa-miR-545-3p                                   | 1.79  | 0.446766 | 2.2   | 0.303698 | 2.74  | 0.195504 |
| hsa-miR-548a-3p                                  | -2.26 | 0.344504 | -2.39 | 0.248551 | -1.26 | 0.69821  |
| hsa-miR-548a-5p                                  | -2.3  | 0.458668 | -1.45 | 0.714466 | -2.29 | 0.538138 |
| hsa-miR-548ah-5p                                 | -1.38 | 0.463105 | -1.48 | 0.389449 | -2.17 | 0.304997 |
| hsa-miR-548al                                    | 2.86  | 0.122062 | 1.26  | 0.789372 | 1.29  | 0.733016 |
| hsa-miR-548ar-5p                                 | -1.38 | 0.806694 | -5.4  | 0.304998 | -1.65 | 0.766502 |
| hsa-miR-548c-5p+hsa-miR-548o-5p+hsa-miR-548am-5p | 4.38  | 0.004591 | 2.48  | 0.18417  | -1.47 | 0.522247 |
| hsa-miR-548e-3p                                  | -1.04 | 0.933797 | -1.05 | 0.965795 | 4.75  | 0.052567 |
| hsa-miR-548h-5p                                  | -1.86 | 0.311733 | -1.56 | 0.501705 | -2.02 | 0.288719 |
| hsa-miR-548j-3p                                  | -1.32 | 0.866383 | -2.03 | 0.654972 | -1.27 | 0.897526 |
| hsa-miR-548j-5p                                  | 1.02  | 0.967368 | -1.19 | 0.802617 | -2.75 | 0.256805 |
| hsa-miR-548k                                     | -2.33 | 0.085468 | -1.05 | 0.741269 | -1.72 | 0.461453 |
| hsa-miR-551a                                     | -1.36 | 0.598883 | 1.5   | 0.408311 | 2.17  | 0.15631  |
| hsa-miR-551b-3p                                  | 2.63  | 0.033229 | 1.37  | 0.362733 | -1.54 | 0.125105 |
| hsa-miR-552-3p                                   | -2.48 | 0.051055 | 1.3   | 0.773529 | -1.16 | 0.758384 |
| hsa-miR-556-3p                                   | 1.16  | 0.74639  | -1.08 | 0.774032 | 3.29  | 0.093885 |
| hsa-miR-556-5p                                   | -1.57 | 0.308996 | -1.06 | 0.886514 | -3.35 | 0.126823 |
| hsa-miR-566                                      | 2.74  | 0.107274 | 2.38  | 0.341185 | 4.06  | 0.015122 |
| hsa-miR-567                                      | -1.4  | 0.413008 | 1.18  | 0.728675 | 2.4   | 0.044058 |
| hsa-miR-570-3p                                   | 1.05  | 0.970531 | 1.37  | 0.815304 | -2.8  | 0.22604  |
| hsa-miR-571                                      | 2.97  | 0.097203 | 1.34  | 0.599674 | -1.17 | 0.835901 |
| hsa-miR-572                                      | 1.27  | 0.709399 | 4.33  | 0.067688 | 1.28  | 0.637015 |
| hsa-miR-576-3p                                   | 1.35  | 0.712791 | 3.01  | 0.212012 | 1.59  | 0.577274 |
| hsa-miR-576-5p                                   | -1.24 | 0.723611 | 1.22  | 0.812563 | 2.33  | 0.243954 |
| hsa-miR-577                                      | -1.24 | 0.720804 | 1.67  | 0.460046 | -1.95 | 0.202084 |
| hsa-miR-578                                      | -1.09 | 0.896761 | 1.53  | 0.247748 | 2.08  | 0.319806 |
| hsa-miR-579-3p                                   | 1.07  | 0.860363 | 3.87  | 0.316652 | -1.01 | 0.965981 |
| hsa-miR-580-3p                                   | -1.01 | 0.993243 | 1.42  | 0.686198 | 2.15  | 0.423602 |
| hsa-miR-582-3p                                   | -1.22 | 0.762599 | 2.33  | 0.256554 | -1.04 | 0.951791 |
| hsa-miR-582-5p                                   | 1.79  | 0.480896 | 2.38  | 0.298689 | 1.95  | 0.416919 |
| hsa-miR-584-5p                                   | -1.19 | 0.808571 | -2.53 | 0.349164 | 1.23  | 0.661392 |
| hsa-miR-592                                      | 3.21  | 0.041893 | -1.32 | 0.479162 | 5.38  | 0.105485 |
| hsa-miR-596                                      | 1.23  | 0.769787 | 1.46  | 0.643134 | 2.08  | 0.230935 |

|                  |       |          |       |          |          |          |
|------------------|-------|----------|-------|----------|----------|----------|
| hsa-miR-600      | 1.24  | 0.710634 | 2.79  | 0.157496 | 1.78     | 0.361465 |
| hsa-miR-601      | -1.1  | 0.851414 | -2.27 | 0.205371 | -1.42    | 0.511827 |
| hsa-miR-606      | -1.43 | 0.463441 | 1.64  | 0.579628 | 3.97     | 0.05015  |
| hsa-miR-607      | 1.05  | 0.909304 | 2.09  | 0.220144 | -1.26    | 0.556967 |
| hsa-miR-608      | 1.64  | 0.451863 | 1.34  | 0.699515 | 4.14     | 0.080839 |
| hsa-miR-615-5p   | 1.25  | 0.517212 | 2.35  | 0.151687 | 8.01     | 0.003056 |
| hsa-miR-617      | -1.42 | 0.498975 | 1.04  | 0.935213 | 2.01     | 0.196288 |
| hsa-miR-619-3p   | -1.11 | 0.822045 | -1.61 | 0.60655  | 3.99     | 0.068477 |
| hsa-miR-625-5p   | -1.69 | 0.394012 | -2.25 | 0.211251 | -2.28    | 0.24158  |
| hsa-miR-626      | -1.15 | 0.717975 | 2.03  | 0.150964 | 1.03     | 0.918433 |
| hsa-miR-627-5p   | -1.58 | 0.874123 | -2.64 | 0.724687 | -1.67    | 0.86308  |
| hsa-miR-629-5p   | 1.3   | 0.63358  | 2.02  | 0.371837 | 2.16     | 0.209149 |
| hsa-miR-638      | 1.32  | 0.586476 | 1.96  | 0.313498 | -1       | 0.998841 |
| hsa-miR-640      | -1.35 | 0.606434 | -2.01 | 0.237331 | -1.2     | 0.72009  |
| hsa-miR-642a-3p  | -2.12 | 0.300776 | -1.1  | 0.903601 | -1.72    | 0.42884  |
| hsa-miR-648      | 1.04  | 0.938697 | 1.2   | 0.750969 | 3.24     | 0.077173 |
| hsa-miR-649      | -2.01 | 0.375905 | 1.47  | 0.491056 | 6.2      | 0.013177 |
| hsa-miR-6503-3p  | 1.16  | 0.516123 | 1.29  | 0.566953 | 2.36     | 0.016734 |
| hsa-miR-6503-5p  | 1.2   | 0.760217 | 2.26  | 0.248683 | 1.86     | 0.432651 |
| hsa-miR-6511a-3p | 1.16  | 0.860193 | 2.26  | 0.353437 | 1.93     | 0.323761 |
| hsa-miR-654-3p   | -1.37 | 0.692335 | 1.03  | 0.951127 | 5.36     | 0.132786 |
| hsa-miR-656-3p   | -2.1  | 0.596218 | -1.04 | 0.876303 | -1.56    | 0.076488 |
| hsa-miR-660-5p   | -1.97 | 0.236928 | 1.02  | 0.955997 | -1.08    | 0.875001 |
| hsa-miR-663a     | 1.8   | 0.135034 | 2.16  | 0.287667 | 2.29     | 0.067287 |
| hsa-miR-664b-3p  | -1.64 | 0.324358 | -2.46 | 0.47818  | -1.83    | 0.295862 |
| hsa-miR-664b-5p  | 1.18  | 0.783399 | 1.33  | 0.70252  | 2.12     | 0.235403 |
| hsa-miR-671-3p   | 1.52  | 0.344373 | 1.93  | 0.297291 | 3.03     | 0.102312 |
| hsa-miR-6720-3p  | -1.1  | 0.812576 | 4.34  | 0.007418 | -1.13    | 0.797645 |
| hsa-miR-675-5p   | 5.41  | 0.02201  | 2.79  | 0.076411 | 2.68     | 0.25661  |
| hsa-miR-764      | 1.76  | 0.319766 | 2.79  | 0.153748 | 1.14     | 0.812939 |
| hsa-miR-765      | 1.43  | 0.594742 | 2.08  | 0.36742  | 1.1      | 0.903661 |
| hsa-miR-766-3p   | 1.15  | 0.602568 | 1.12  | 0.686959 | 2.6      | 0.039628 |
| hsa-miR-767-3p   | -1.49 | 0.576146 | -1.84 | 0.328345 | 3.43     | 0.018749 |
| hsa-miR-769-3p   | 1.39  | 0.298266 | 2.75  | 0.029759 | 1.1      | 0.75675  |
| hsa-miR-802      | 1.79  | 0.459516 | 2.44  | 0.366186 | 2.43     | 0.27464  |
| hsa-miR-874-3p   | -1.14 | 0.824334 | 1.22  | 0.747043 | -2.23    | 0.45075  |
| hsa-miR-874-5p   | 2.03  | 0.107674 | 1.39  | 0.541506 | 1.99     | 0.204098 |
| hsa-miR-876-3p   | 1.12  | 0.810102 | -1.01 | 0.979603 | 2.96     | 0.048348 |
| hsa-miR-890      | 3.87  | 0.185113 | 3.57  | 0.386015 | 15456.06 | 0.003142 |
| hsa-miR-892a     | -2.48 | 0.100287 | -1.02 | 0.975613 | 1.44     | 0.156415 |
| hsa-miR-9-5p     | 1.3   | 0.63854  | 1.29  | 0.763421 | 1.96     | 0.465561 |
| hsa-miR-922      | -1.81 | 0.095599 | 2.15  | 0.232136 | -1.9     | 0.35034  |
| hsa-miR-92a-1-5p | -1.21 | 0.684783 | -2.53 | 0.157994 | -1.52    | 0.476125 |

|                |       |          |      |          |       |          |
|----------------|-------|----------|------|----------|-------|----------|
| hsa-miR-933    | -1.1  | 0.864532 | 2.31 | 0.247692 | 3.03  | 0.182817 |
| hsa-miR-939-5p | 1.61  | 0.292182 | 2.37 | 0.13067  | 2.02  | 0.092317 |
| hsa-miR-940    | -1.26 | 0.544992 | 1.48 | 0.612547 | 4.61  | 0.004045 |
| hsa-miR-944    | -2.07 | 0.592219 | 1    | 0.999685 | -1.49 | 0.691642 |
| hsa-miR-96-5p  | 2.16  | 0.282201 | 1.9  | 0.29488  | 2.61  | 0.161049 |

\*p-values are calculated from 3 independent (performed on separate dates) replicate transfection experiments.

Supplementary Table 2: Effect of MetS-FL miRs on each other's endogenous expression levels in CRL-1790 cells.

|                | <b>Fold change of expression by<br/>hsa-miR-142-3p mimic</b> | <b>Fold change of expression<br/>by hsa-miR-18b mimic</b> | <b>Fold change of expression by<br/>hsa-miR-890 mimic</b> |
|----------------|--------------------------------------------------------------|-----------------------------------------------------------|-----------------------------------------------------------|
| hsa-miR-142-3p | 8821.28<br>*p = 0.000014                                     | 2.38<br>p = 0.0838                                        | -1.31<br>p = 0.4149                                       |
| hsa-miR-18b    | -2.81<br>p = 0.6243                                          | 2088.21<br>p = 0.0454                                     | -3.69<br>p = 0.5328                                       |
| hsa-miR-890    | 3.87<br>p = 0.1851                                           | 3.57<br>p = 0.3860                                        | 15456.06<br>p = 0.0031                                    |

\*p-values are calculated from 3 independent (performed on separate dates) replicate transfection experiments.
